# Supplementary material
Source: publisher site journal article supplement (https://e-cmh.org/upload/media/cmh-2023-0034-Supplementary-Table-4.pdf)
Supplement: Supplementary file 1 [file cmh-2023-0034-Supplementary-Table-4.pdf]

**Supplementary Table 4.** Diagnostic performance of MRI findings in prediction of any degree of microvascular invasion

| MRI finding                      | Sensitivity (%)                | Specificity (%)                 | AUC                     | Accuracy (%)                   | PPV (%)                        | NPV (%)                        |
|----------------------------------|--------------------------------|---------------------------------|-------------------------|--------------------------------|--------------------------------|--------------------------------|
| Arterial peritumoral enhancement | 36.4 (71/195)<br>[28.4, 45.9]  | 79.7 (248/311)<br>[70.1, 90.3]  | 0.640<br>[0.595, 0.683] | 63.0 (319/506)<br>[56.3, 70.4] | 53.0 (71/134)<br>[41.1, 66.8]  | 66.7 (248/372)<br>[58.6, 75.5] |
| Non-smooth tumor margin          | 78.0 (152/195)<br>[66.1, 91.4] | 33.4 (104/311)<br>[27.3, 40.5]  | 0.594<br>[0.549, 0.638] | 50.6 (256/506)<br>[44.6, 57.2] | 42.3 (152/359)<br>[35.9, 49.6] | 70.8 (104/147)<br>[57.8, 85.7] |
| Peritumoral hypointensity on HBP | 49.7 (97/195)<br>[40.3, 60.7]  | 75.2 (234/311)<br>[65.9, 85.5]  | 0.664<br>[0.620, 0.706] | 65.4 (331/506)<br>[58.6, 72.9] | 55.8 (97/174)<br>[45.2, 68.0]  | 70.5 (234/332)<br>[61.7, 80.1] |
| Satellite nodule                 | 15.9 (31/195)<br>[10.8, 22.6]  | 89.1 (277/311)<br>[78.9, 100.0] | 0.624<br>[0.579, 0.667] | 60.9 (308/506)<br>[54.3, 68.1] | 47.7 (31/65)<br>[32.4, 67.7]   | 62.8 (277/441)<br>[55.6, 70.7] |

The lower and upper values of 95% confidence interval are presented in the brackets.

MRI, magnetic resonance imaging; AUC, area under the curve; PPV, positive predictive value; NPV, negative predictive value; HBP, hepatobiliary phase.
